# Supplementary material
Source: PubMed Central journal article supplement (PMC5147421)

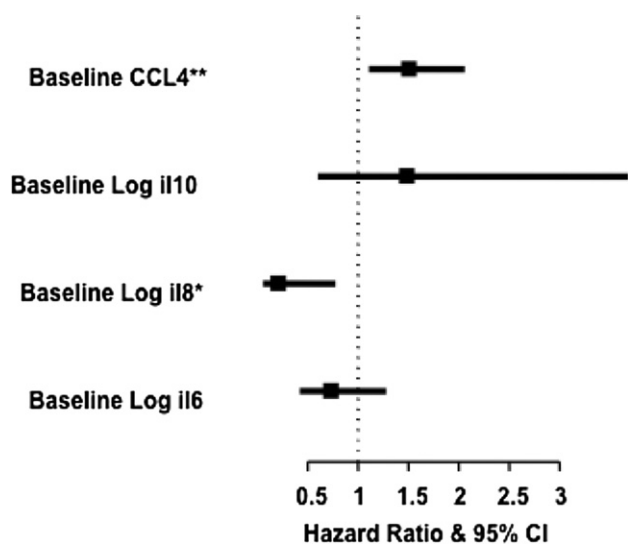

**FIGURE E1.** Baseline cytokine values are associated with differences in the chance of early extubation in untreated patients younger than 5 months old. \* $P < .05$ ; \*\* $P < .01$ . *CI*, Confidence interval; *CCL4*, chemokine (C-C motif) ligand 4.

**TABLE E1.** Baseline characteristics for entire cohort versus cytokine analysis subset

| Characteristic                | Cytokine data |              | <i>P</i> value |
|-------------------------------|---------------|--------------|----------------|
|                               | No (n = 117)  | Yes (n = 76) |                |
| Male gender (n)               | 54 (46%)      | 30 (39%)     | .44            |
| Risk stratification           |               |              | .05*           |
| High                          | 31            | 31           |                |
| Low                           | 86            | 45           |                |
| Age (mo)                      |               |              | .04*           |
| Median                        | 5.8           | 3.6          |                |
| Range                         | 0-21.7        | 0-23.2       |                |
| Baseline triiodothyronine (U) | 151           | 180          | <.01*          |
| Mean intubation time (h)      | 89            | 104          | .56            |
| Mean crossclamp time (min)    | 62            | 62           | .98            |
| Mean bypass time (min)        | 99            | 97           | .69            |
| Deaths (n)                    | 4             | 4            | .79            |

All *P* values presented were derived from Student *t* test, except for gender, risk, and death, which were derived from a simple chi-square test. \*Statistical significance ( $P \leq .05$ ).

**TABLE E2.** Change in cytokine levels in untreated patients after cardiopulmonary bypass at 6 and 24 hours after crossclamping

| Variable     | Change from baseline to 6 h |       |               |                | Change from baseline to 24 h |       |                |                |
|--------------|-----------------------------|-------|---------------|----------------|------------------------------|-------|----------------|----------------|
|              | Patients (n)                | Mean  | 95% CI        | <i>P</i> value | Patients (n)                 | Mean  | 95% CI         | <i>P</i> value |
| IL-6         | 34                          | 2.80  | 3.23 to 2.37  | <.0001*        | 34                           | 2.83  | 3.21 to 2.45   | <.0001*        |
| IL-8         | 37                          | 1.11  | 1.42 to 0.81  | <.0001*        | 37                           | 1.09  | 1.39 to 0.78   | <.0001*        |
| IL-10        | 32                          | 2.28  | 2.85 to 1.72  | <.0001*        | 32                           | 0.84  | 1.26 to 0.41   | .0003          |
| IL-1 $\beta$ | 33                          | 0.01  | 0.13 to -0.11 | .8923          | 33                           | -0.01 | 0.09 to -0.11  | .8586          |
| MCP1         | 38                          | -0.17 | 0.03 to -0.38 | .0956          | 37                           | -0.12 | 0.09 to -0.32  | .2562          |
| MIP1 $\beta$ | 38                          | -0.18 | 0.01 to -0.36 | .0602          | 38                           | -0.48 | -0.30 to -0.66 | <.0001*        |

*CI*, Confidence interval; *IL*, interleukin; *MCP*, monocyte chemotactic protein; *MIP*, macrophage inflammatory protein. \*Statistical significance ( $P \leq .05$ ).

**TABLE E3. Six-hour cytokine levels associated with differences in triiodothyronine levels through 72 hours in untreated patients**

| Variable        | DF | Parameter estimate | SE      | t value | Pr >  t | 95% CI               |
|-----------------|----|--------------------|---------|---------|---------|----------------------|
| 6-h R-square    |    | 0.4441             |         |         |         |                      |
| Intercept       | 1  | 5.30402            | 0.16089 | 32.97   | <.0001  | 4.97496 to 5.63308   |
| IL-10_6         | 1  | -0.06695           | 0.03475 | -1.93   | .0639   | -0.13802 to 0.00412  |
| High risk       | 1  | -0.28301           | 0.08473 | -3.34   | .0023   | -0.45630 to -0.10972 |
| IL-1 $\beta$ -6 | 1  | -0.39099           | 0.13190 | -2.96   | .0060   | -0.66075 to -0.12123 |
| 12-h R-square   |    | 0.3522             |         |         |         |                      |
| Intercept       | 1  | 5.20233            | 0.17535 | 29.67   | <.0001  | 4.84370 to 5.56097   |
| IL-10_6         | 1  | -0.08030           | 0.03787 | -2.12   | .0427   | -0.15775 to -0.00284 |
| High risk       | 1  | -0.15740           | 0.09235 | -1.70   | .0990   | -0.34627 to 0.03146  |
| IL-1 $\beta$ -6 | 1  | -0.46652           | 0.14375 | -3.25   | .0030   | -0.76052 to -0.17252 |
| 24-h R-square   |    | 0.3229             |         |         |         |                      |
| Intercept       | 1  | 4.94740            | 0.17787 | 27.81   | <.0001  | 4.58361 to 5.31119   |
| IL-10_6         | 1  | -0.10474           | 0.03842 | -2.73   | .0107   | -0.18331 to -0.02617 |
| High risk       | 1  | -0.01538           | 0.09367 | -0.16   | .8707   | -0.20696 to 0.17620  |
| IL-1 $\beta$ -6 | 1  | -0.46901           | 0.14582 | -3.22   | .0032   | -0.76724 to -0.17079 |
| 72-h R-square   |    | 0.1996             |         |         |         |                      |
| Intercept       | 1  | 5.12113            | 0.37185 | 13.77   | <.0001  | 4.34997 to 5.89230   |
| IL-10_6         | 1  | -0.08782           | 0.07566 | -1.16   | .2582   | -0.24474 to 0.06909  |
| High risk       | 1  | -0.08639           | 0.18143 | -0.48   | .6387   | -0.46264 to 0.28987  |
| IL-1 $\beta$ -6 | 1  | -0.65791           | 0.28984 | -2.27   | .0334   | -1.25901 to -0.05682 |

CI, Confidence interval; DF, degrees of freedom; IL, interleukin; SE, standard error.

**TABLE E4. Anatomic diagnoses**

- Isolated ventricular septal defect
- Tetralogy of Fallot
- Transposition of the great arteries
- Hypoplastic left ventricle
- Complete atrioventricular canal defect
- Total anomalous pulmonary venous drainage
- Other low-risk cardiopulmonary bypass
- Other high-risk cardiopulmonary bypass
- Superior vena cava to pulmonary anastomosis

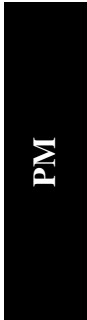

Supplement: NIHMS390748-supplement-supplement_1.pdf [file NIHMS390748-supplement-supplement_1.pdf]
